# Supplementary material for: Human respiratory organoids sustained reproducible propagation of human rhinovirus C and elucidation of virus-host interaction
Source: PubMed Central journal article supplement (PMC11686133; doi:10.1038/s41467-024-55076-2), 2024-12-30
Supplement: 41467_2024_55076_MOESM1_ESM.pdf [file 41467_2024_55076_MOESM1_ESM.pdf]

**Supplementary Figure 1. Phylogenetic analysis of 8 isolated HRV-C and 43 HRV-C reference subtypes based on the 5' UTR (372bp, position nt 179-551).**

5' UTR

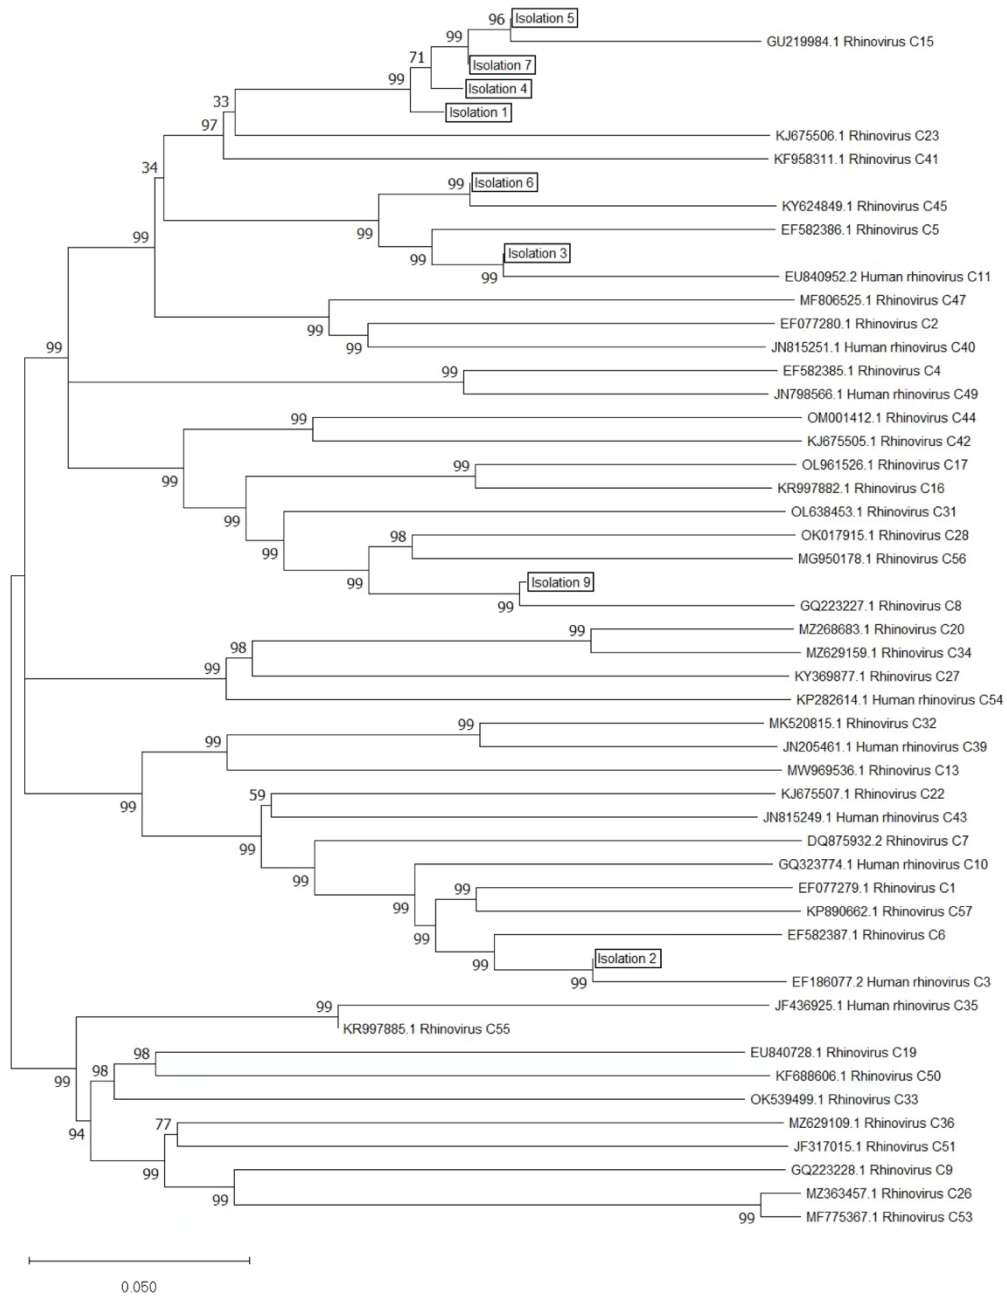

The phylogenetic tree was constructed using the neighbor-joining method and p-distance model with bootstrap replicated from 1,000 trees using MEGA 10.2.3. Genetic distance is represented by the scale bar.

**Supplementary Figure 2. Phylogenetic analysis of 8 isolated HRV-C and 43 HRV-C reference subtypes based on the VP4/VP2 gene (540bp, position nt 547-1087).**

VP4/VP2

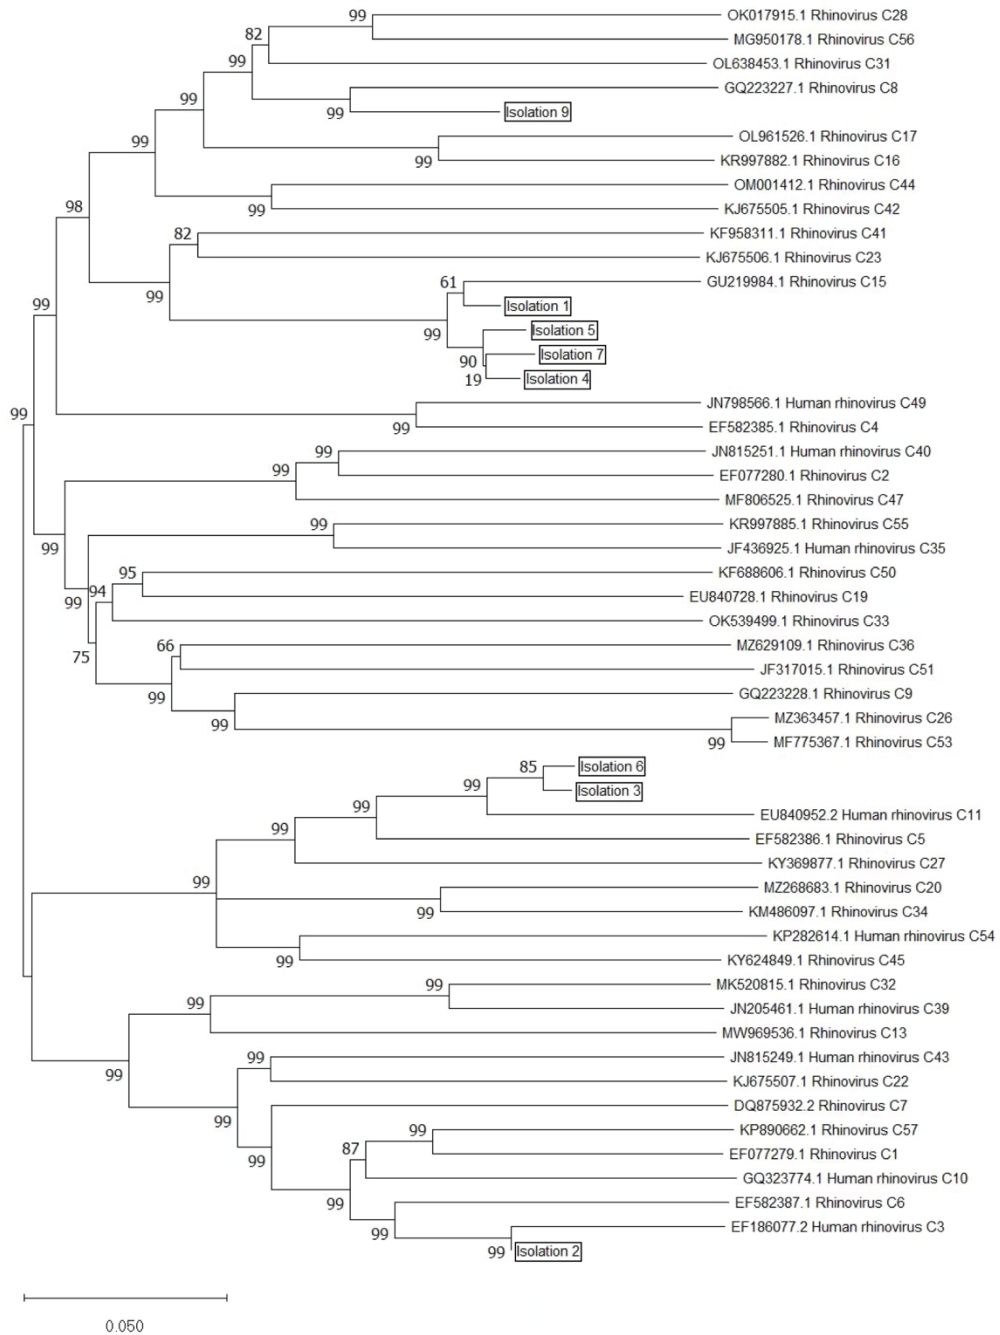

The phylogenetic tree was constructed using the neighbor-joining method and p-distance model with bootstrap replicated from 1,000 trees using MEGA 10.2.3. Genetic distance is represented by the scale bar.

**Supplementary Figure 3. Orthogonal views of human airway organoid with HRV-C infection.**

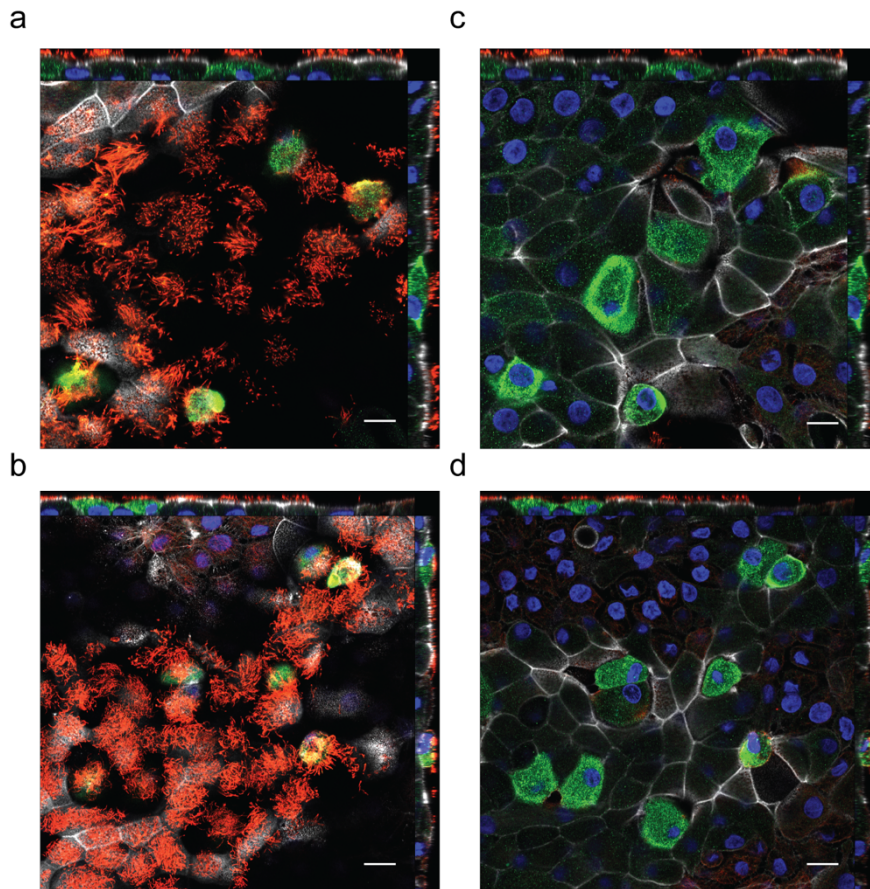

(a-d) Orthogonal views of human airway organoid with HRV-C infection. Airway organoids were fixed and double-stained with an  $\alpha$ -VP3 (green) and  $\alpha$ -ACCTUB (red). Upper layers (a, b) and lower layers (c, d) of orthogonal views of confocal images with en face and cross-section are shown. Nuclei and actin filaments were counterstained with DAPI (blue) and Phalloidin-647 (white), respectively. The experiment was performed three times independently with similar results. Scale bar, 10  $\mu$ m.

**Supplementary Figure 4. Human nasal organoid sustained serial HRV-C propagation.**

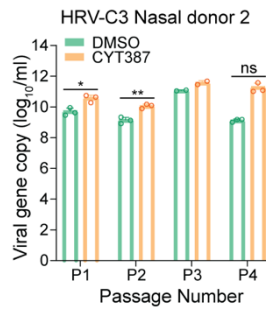

Nasal organoids pre-treated with CYT387 or DMSO were inoculated with HRV-C3 at 100 viral gene copy/cell and incubated in the presence of CYT387 or DMSO respectively. CYT387- and DMSO-treated media were brought forward as inoculum to the next round of infection, during which CYT387 and DMSO treatment continued. Culture media were harvested at 96 h.p.i. to detect viral replication (P1, P2, and P4, n=3; P3, n=2). Data represent mean and SD of the indicated number (n) of biological replicates from a representative experiment. Statistical significance (in P1, P2, and P4) was determined using a two-tailed Student's t-test. \* $P < 0.05$ , \*\* $P < 0.01$ . *ns* not significant. Source data are provided as a Source Data file.

**Supplementary Figure 5. Orthogonal views of human nasal organoid with HRV-C infection.**

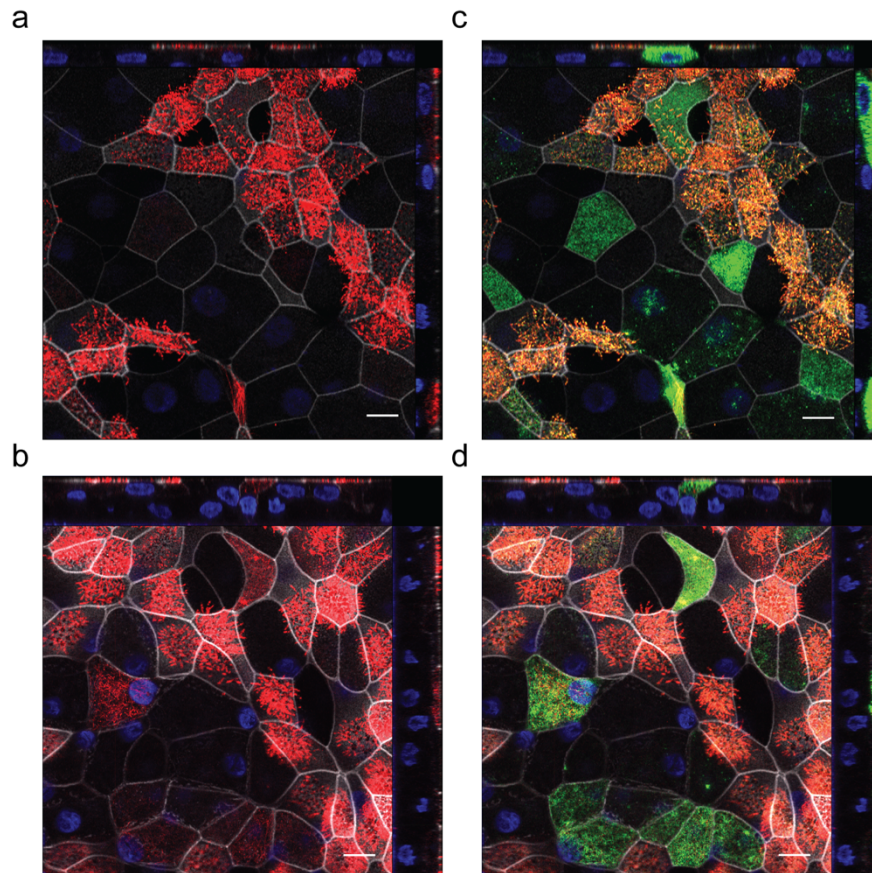

(a-d) Orthogonal views of human nasal organoid with HRV-C infection. Nasal organoids were fixed and double-stained with an  $\alpha$ -VP3 (green) and  $\alpha$ -ACCTUB (red). Orthogonal views of confocal images with en face and cross-section are shown. Nuclei and actin filaments were counterstained with DAPI (blue) and Phalloidin-647 (white), respectively. (a, b) Three channels are shown:  $\alpha$ -ACCTUB (red), DAPI (blue), and Phalloidin-647 (white). (c, d) Four channels are shown:  $\alpha$ -VP3 (green),  $\alpha$ -ACCTUB (red), DAPI (blue), and Phalloidin-647 (white). The experiment was repeated three times independently with similar results. Scale bar, 10  $\mu$ m.

## Supplementary Figure 6. Host transcriptional response in human airway and nasal organoids.

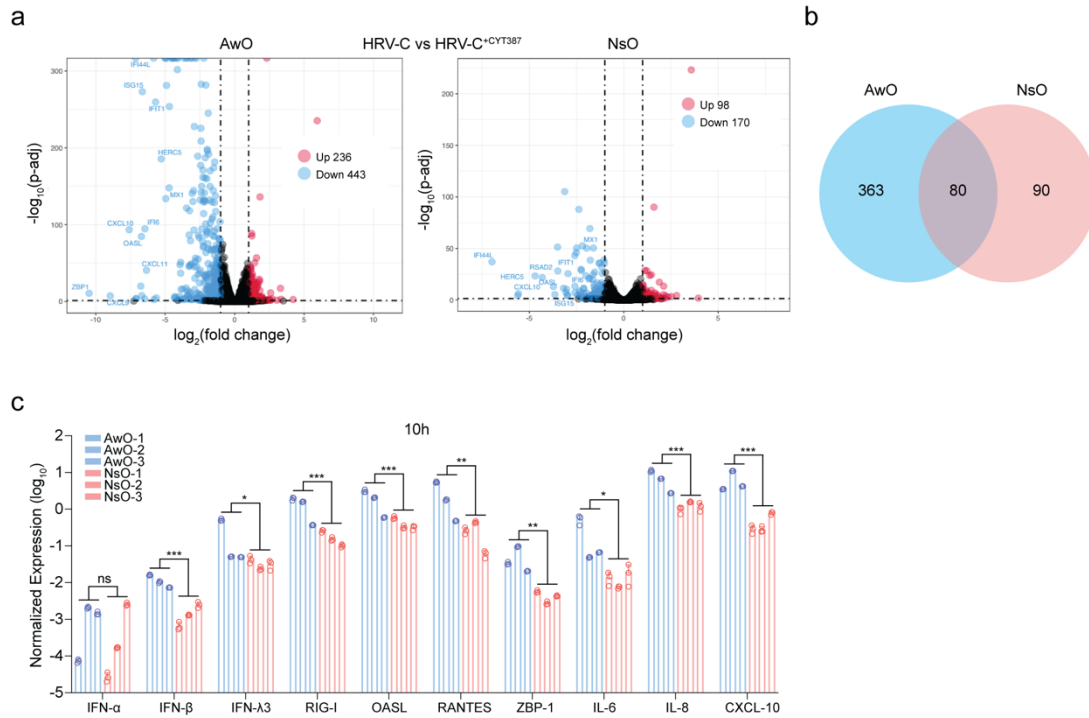

HRV-C3 infected airway (AwO) organoids and nasal organoids (NsO) treated with CYT387 (HRV-C<sup>+CYT387</sup>) or DMSO (HRV-C) were applied to RNA sequencing analysis. (a) Volcano plot shows DEGs in the HRV-C-infected airway and nasal organoids with CYT387 treatment compared with HRV-C-infected organoids. DEGs with a  $\log_2(\text{fold change}) > 1$  and  $< -1$  are shown in red and blue respectively. (b) Venn diagram shows the numbers of unique and common downregulated DEGs in the infected airway and nasal organoids. (c) Three lines of airway and nasal organoids were treated with 10  $\mu\text{g/ml}$  Poly(I:C) or mock-treated. At 10 h post-treatment, organoids were harvested for RT-qPCR ( $n=3$ ). Results showed the GAPDH normalized expression level of innate immune molecules in the airway and nasal organoids. Data represent mean and SD of the indicated number ( $n$ ) of biological replicates from a representative experiment. Statistical significance (in c) was determined using a two-tailed Student's t-test. \* $P < 0.05$ , \*\* $P < 0.01$ , \*\*\* $P < 0.001$ . *ns* not significant. Source data are provided as a Source Data file for Supplementary Figure 6c.

**Supplementary Figure 7. High CDHR3 expression on the apical surface of the airway organoids.**

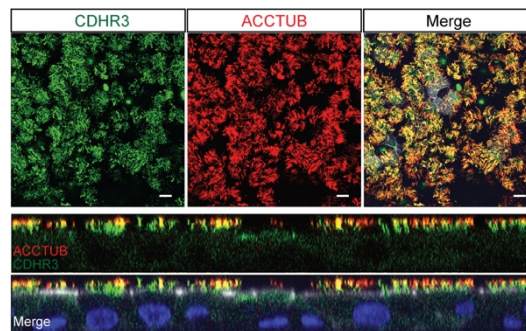

Airway organoids were fixed and double-stained with an  $\alpha$ -CDHR3 (green) and  $\alpha$ -ACCTUB (red). Confocal images of en face (top) and cross-section (bottom) are shown. Nuclei and actin filaments were counterstained with DAPI (blue) and Phalloidin-647 (white), respectively. The experiment was performed three times independently with similar results. Scale bar, 10  $\mu$ m.

**Supplementary Table 1. Antibody list.**

| <b>Name</b>          | <b>Supplier</b> | <b>Cat. no.</b> | <b>Lot no.</b> | <b>Dilution (IF)</b> | <b>Dilution (Flow)</b> |
|----------------------|-----------------|-----------------|----------------|----------------------|------------------------|
| Mouse IgG            | abcam           | ab91353         | GR3327311-3    | 1:100                | 1:100                  |
| Rabbit IgG           | abcam           | ab172730        | GR3284310-8    | 1:100                | 1:100                  |
| Rhinovirus VP3       | Invitrogen      | MA5-18249       | YD3903932      | 1:100                | 1:100                  |
| CDHR3                | abcam           | ab121337        | 1016309-2      | 1:100                | 1:100                  |
| CDHR3                | Sigma-Aldrich   | HPA011218       | 000006575      | 1:100                | -                      |
| TUBULIN              | abcam           | ab179509        | GR252919-6     | 1:100                | 1:1000                 |
| TUBULIN              | Sigma-Aldrich   | T7941           | 088M4793       | 1:100                | -                      |
| Goat anti-Mouse 488  | invitrogen      | A-11001         | 2090562        | 1:200                | 1:300                  |
| Goat anti-Mouse 594  | invitrogen      | A-11005         | 1750828        | 1:200                | -                      |
| Goat anti-Rabbit 488 | invitrogen      | A-11034         | 1885241        | 1:200                | 1:300                  |
| Goat anti-Rabbit 594 | invitrogen      | A-11037         | 1608397        | 1:200                | 1:300                  |



**Supplementary Table 2. Primer sequences for qPCR analysis**

| <b>Gene</b>      | <b>Sequence</b>                                                                                                                            |
|------------------|--------------------------------------------------------------------------------------------------------------------------------------------|
| IFN- $\alpha$    | F 5'-AGAATCACTCTCTATCTGAAAGAGAAGAAATA-3'<br>R 5'-TCATGATTTCTGCTCTGACAACCT-3'                                                               |
| IFN- $\beta$     | F 5'-CTTGGATTCTACAAAGAAGCAGC-3'<br>R 5'-TCCTCCTTCTGGAAGTCTGCA-3'                                                                           |
| IFN- $\lambda$ 3 | F 5'-TCGAGGCCTCTGTCACCTTC-3'<br>R 5'-AGGTTGCATGACTGGCGGAA-3'                                                                               |
| RIG-I            | F 5'-AGAGCACTTGTGGACGCTTT-3'<br>R 5'-GCCACGTCCAGTCAATATGC-3'                                                                               |
| OASL             | F 5'-AAACCATGTGGCAAAGCCAG-3'<br>R 5'-GCTCTGTAGGCAGGCACAAT-3'                                                                               |
| RANTES           | F 5'-TCATTGCTACTGCCCTCTGC-3'<br>R 5'-TACTCCTTGATGTGGGCACG-3'                                                                               |
| ZBP1             | F 5'-GCAAACCTCCGAAGCCATCCAGA-3'<br>R 5'-CCAAGTTGAGGAATCACCTGGTG-3'                                                                         |
| IL-6             | F 5'-AGACAGCCACTCACCTCTTCAG-3'<br>R 5'-TTCTGCCAGTGCCTCTTTGCTG-3'                                                                           |
| IL-8             | F 5'-GAGAGTGATTGAGAGTGGACCAC-3'<br>R 5'-CACAACCCTCTGCACCCAGTTT-3'                                                                          |
| IP-10            | F 5'-GAAATTATTCCTGCAAGCCAATTT-3'<br>R 5'-TCACCCTTCTTTTTCATTGTAGCA-3'                                                                       |
| HRV-C 5' UTR     | F1 5'-AGCCYGCGTGGCKGCC-3'<br>F2 5'-AGCCYGCGTGGTGCCC-3'<br>R 5'-GAAACACGGACACCCAAAGTAGT-3'<br>Probe 5' HEX-TCCGGCCCCTGAATGYGGCTAA-IABkFQ 3' |



HRV-C\_P0 1201 CATCAGTTAGCATACATTGGAGGTGACAACACCCGAGTCAAATATAAGCACACACACCCAGGTGAATTAGGCCATAAAAT  
HRV-C\_P1 1201 CATCAGTTAGCATACATTGGAGGTGACAACACCCGAGTCAAATATAAGCACACACACCCAGGTGAATTAGGCCATAAAAT  
HRV-C\_P6 1201 CATCAGTTAGCATACATTGGAGGTGACAACACCCGAGTCAAATATAAGCACACACACCCAGGTGAATTAGGCCATAAAAT

HRV-C\_P0 1281 TGGTAGTAACTCAGAAAGAGGTGATAATCAACCAGATGAAAACCTTTCTTCAACTGCAATGGAACCTTTGCTGGGAAATT  
HRV-C\_P1 1281 TGGTAGTAACTCAGAAAGAGGTGATAATCAACCAGATGAAAACCTTTCTTCAACTGCAATGGAACCTTTGCTGGGAAATT  
HRV-C\_P6 1281 TGGTAGTAACTCAGAAAGAGGTGATAATCAACCAGATGAAAACCTTTCTTCAACTGCAATGGAACCTTTGCTGGGAAATT

HRV-C\_P0 1361 TAACAATCTTCCCACACCAACTCATAAACTTGAGGACAAACAACCTCAAGCACCATTGTTGTGCCCTATATTAAGTGCACA  
HRV-C\_P1 1361 TAACAATCTTCCCACACCAACTCATAAACTTGAGGACAAACAACCTCAAGCACCATTGTTGTGCCCTATATTAAGTGCACA  
HRV-C\_P6 1361 TAACAATCTTCCCACACCAACTCATAAACTTGAGGACAAACAACCTCAAGCACCATTGTTGTGCCCTATATTAAGTGCACA

HRV-C\_P0 1441 CCCATGGACAGCATGTTACGCCATAATAATGTGTCACCTGTTATTATACCTATATGTCCTCTGCGAGCACCAGCTACAGC  
HRV-C\_P1 1441 CCCATGGACAGCATGTTACGCCATAATAATGTGTCACCTGTTATTATACCTATATGTCCTCTGCGAGCACCAGCTACAGC  
HRV-C\_P6 1441 CCCATGGACAGCATGTTACGCCATAATAATGTGTCACCTGTTATTATACCTATATGTCCTCTGCGAGCACCAGCTACAGC

HRV-C\_P0 1521 TCCCTCAACCTTGCCAATCACAATATCCATTGCCCCCATCAAATCAGAATTTTCGGGCGCAAGACAGTCTGCTAAAGCAC  
HRV-C\_P1 1521 TCCCTCAACCTTGCCAATCACAATATCCATTGCCCCCATCAAATCAGAATTTTCGGGCGCAAGACAGTCTGCTAAAGCAC  
HRV-C\_P6 1521 TCCCTCAACCTTGCCAATCACAATATCCATTGCCCCCATCAAATCAGAATTTTCGGGCGCAAGACAGTCTGCTAAAGCAC

HRV-C\_P0 1601 AAGGCCTACCAGTGAGAATGCCAAGTGGAGCCAACCAGTTCATGACAACAGAGGATGAACAGTCTCCAAACATACTCCCC  
HRV-C\_P1 1601 AAGGCCTACCAGTGAGAATGCCAAGTGGAGCCAACCAGTTCATGACAACAGAGGATGAACAGTCTCCAAACATACTCCCC  
HRV-C\_P6 1601 AAGGCCTACCAGTGAGAATGCCAAGTGGAGCCAACCAGTTCATGACAACAGAGGATGAACAGTCTCCAAACATACTCCCC

HRV-C\_P0 1681 AGCTTCCATTCAACTAAACAAATTACATACCTGGTGAATTAAGACAATTATGGACATGGCTCGCGTAGACTCCTTTAT  
HRV-C\_P1 1681 AGCTTCCATTCAACTAAACAAATTACATACCTGGTGAATTAAGACAATTATGGACATGGCTCGCGTAGACTCCTTTAT  
HRV-C\_P6 1681 AGCTTCCATTCAACTAAACAAATTACATACCTGGTGAATTAAGACAATTATGGACATGGCTCGCGTAGACTCCTTTAT

HRV-C\_P0 1761 GCCTATAAATAATGTGAATCAGTCTCATACTGGGGGTTTACTACATCACAATACCAAATGTGAGCAGTGAGAGGAAAA  
HRV-C\_P1 1761 GCCTATAAATAATGTGAATCAGTCTCATACTGGGGGTTTACTACATCACAATACCAAATGTGAGCAGTGAGAGGAAAA  
HRV-C\_P6 1761 GCCTATAAATAATGTGAATCAGTCTCATACTGGGGGTTTACTACATCACAATACCAAATGTGAGCAGTGAGAGGAAAA

HRV-C\_P0 1841 TACTGGCTATACCACTAGATATGAGTAATACACTTTTCTCTACAACACTTATGGGGGAAGTTCTAAACTACTACTCAAAT  
HRV-C\_P1 1841 TACTGGCTATACCACTAGATATGAGTAATACACTTTTCTCTACAACACTTATGGGGGAAGTTCTAAACTACTACTCAAAT  
HRV-C\_P6 1841 TACTGGCTATACCACTAGATATGAGTAATACACTTTTCTCTACAACACTTATGGGGGAAGTTCTAAACTACTACTCAAAT

HRV-C\_P0 1921 TGGTCTGGGTCAATCAAACCTTACATTCTTCTGTGTTTGTGACAGCTTCAGCACTGGTAAGTTCTTGATAGCATACACCCC  
HRV-C\_P1 1921 TGGTCTGGGTCAATCAAACCTTACATTCTTCTGTGTTTGTGACAGCTTCAGCACTGGTAAGTTCTTGATAGCATACACCCC  
HRV-C\_P6 1921 TGGTCTGGGTCAATCAAACCTTACATTCTTCTGTGTTTGTGACAGCTTCAGCACTGGTAAGTTCTTGATAGCATACACCCC

HRV-C\_P0 2001 TCCAGGTGCTGACATCCCAGAGACACGCCGTGATGCAATGCTCGGCACACATGTCGTGTGGGACCTGGGTCTCCAATCAT  
HRV-C\_P1 2001 TCCAGGTGCTGACATCCCAGAGACACGCCGTGATGCAATGCTCGGCACACATGTCGTGTGGGACCTGGGTCTCCAATCAT  
HRV-C\_P6 2001 TCCAGGTGCTGACATCCCAGAGACACGCCGTGATGCAATGCTCGGCACACATGTCGTGTGGGACCTGGGTCTCCAATCAT

HRV-C\_P0 2081 CATGCCACCTTGTGTACCTTGGATCAGCTCTCATTTCTTTCAGGAGGACCAGAAAGGACAACCTACACAGAGAGTGGGTTCC  
HRV-C\_P1 2081 CATGCCACCTTGTGTACCTTGGATCAGCTCTCATTTCTTTCAGGAGGACCAGAAAGGACAACCTACACAGAGAGTGGGTTCC  
HRV-C\_P6 2081 CATGCCACCTTGTGTACCTTGGATCAGCTCTCATTTCTTTCAGGAGGACCAGAAAGGACAACCTACACAGAGAGTGGGTTCC

HRV-C\_P0 2161 GTTACATTGTGGCATCAGACAGCATTGTGTCCAATGGAACCTCAGGATCCATAATGGTACCTGCTCTGCTTGCTCTGA  
HRV-C\_P1 2161 GTTACATTGTGGCATCAGACAGCATTGTGTCCAATGGAACCTCAGGATCCATAATGGTACCTGCTCTGCTTGCTCTGA  
HRV-C\_P6 2161 GTTACATTGTGGCATCAGACAGCATTGTGTCCAATGGAACCTCAGGATCCATAATGGTACCTGCTCTGCTTGCTCTGA

HRV-C\_P0 2241 CATGTCAGTCCGCATGTTGCGAGACACACCCATGATGAAGCAAGAAGATAACATCACTCAAACCCAGTGGAAAGAGTTTG  
HRV-C\_P1 2241 CATGTCAGTCCGCATGTTGCGAGACACACCCATGATGAAGCAAGAAGATAACATCACTCAAACCCAGTGGAAAGAGTTTG  
HRV-C\_P6 2241 CATGTCAGTCCGCATGTTGCGAGACACACCCATGATGAAGCAAGAAGATAACATCACTCAAACCCAGTGGAAAGAGTTTG

HRV-C\_P0 2321 TAGAGCACACATTAAGAGAGGTGTTGGTAGTTCCAGACACTCAAGCTTCAGGACCTGTTTATACCACCAAACCAAGCT  
HRV-C\_P1 2321 TAGAGCACACATTAAGAGAGGTGTTGGTAGTTCCAGACACTCAAGCTTCAGGACCTGTTTATACCACCAAACCAAGCT  
HRV-C\_P6 2321 TAGAGCACACATTAAGAGAGGTGTTGGTAGTTCCAGACACTCAAGCTTCAGGACCTGTTTATACCACCAAACCAAGCT

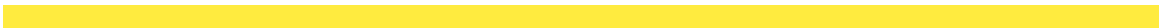

HRV-C\_P0 2401 CTAGGTGCTGTAGAAATAGGAGCAACTGCTGATGTGGGCCAGAAACATTAATTGAGACAAGATACGTAATGAATGACAA  
HRV-C\_P1 2401 CTAGGTGCTGTAGAAATAGGAGCAACTGCTGATGTGGGCCAGAAACATTAATTGAGACAAGATACGTAATGAATGACAA  
HRV-C\_P6 2401 CTAGGTGCTGTAGAAATAGGAGCAACTGCTGATGTGGGCCAGAAACATTAATTGAGACAAGATACGTAATGAATGACAA

HRV-C\_P0 2481 CACAAATGCTGAGGCAGCAGTGGAGAACTTCTGGGAAGATCTGCTTTGTGGCAAATCTAAGGCTGGATCAGGGTTTCA  
HRV-C\_P1 2481 CACAAATGCTGAGGCAGCAGTGGAGAACTTCTGGGAAGATCTGCTTTGTGGCAAATCTAAGGCTGGATCAGGGTTTCA  
HRV-C\_P6 2481 CACAAATGCTGAGGCAGCAGTGGAGAACTTCTGGGAAGATCTGCTTTGTGGCAAATCTAAGGCTGGATCAGGGTTTCA

HRV-C\_P0 2561 GGAAATGGGAGATAAACTTCCAAGAACATGCCAAGTCAGGAAAAAGTTTGAGATGTTACATATGTTAGATTTGACCTG  
HRV-C\_P1 2561 GGAAATGGGAGATAAACTTCCAAGAACATGCCAAGTCAGGAAAAAGTTTGAGATGTTACATATGTTAGATTTGACCTG  
HRV-C\_P6 2561 GGAAATGGGAGATAAACTTCCAAGAACATGCCAAGTCAGGAAAAAGTTTGAGATGTTACATATGTTAGATTTGACCTG

HRV-C\_P0 2641 GAAATAACAATTGTCACCAACAATAAGGGATTGATGCAAATTATGTTTGTACCTCCAGGAATCACACCTCCAGGAGGGAA  
HRV-C\_P1 2641 GAAATAACAATTGTCACCAACAATAAGGGATTGATGCAAATTATGTTTGTACCTCCAGGAATCACACCTCCAGGAGGGAA  
HRV-C\_P6 2641 GAAATAACAATTGTCACCAACAATAAGGGATTGATGCAAATTATGTTTGTACCTCCAGGAATCACACCTCCAGGAGGGAA

HRV-C\_P0 2721 AGATGGTAGGGAATGGGACACAGCTTCTAACCTAGTGTCTTCTTCCAACCAAACCTCTGGTTTCCCGAGATTCACGATAC  
HRV-C\_P1 2721 AGATGGTAGGGAATGGGACACAGCTTCTAACCTAGTGTCTTCTTCCAACCAAACCTCTGGTTTCCCGAGATTCACGATAC  
HRV-C\_P6 2721 AGATGGTAGGGAATGGGACACAGCTTCTAACCTAGTGTCTTCTTCCAACCAAACCTCTGGTTTCCCGAGATTCACGATAC

HRV-C\_P0 2801 CCTTCACAGGGTTGGGATCGGCATACTATATGTTCTATGATGGATATGATGGTACTGACGATGCCAATATAAATTATGGA  
HRV-C\_P1 2801 CCTTCACAGGGTTGGGATCGGCATACTATATGTTCTATGATGGATATGATGGTACTGACGATGCCAATATAAATTATGGA  
HRV-C\_P6 2801 CCTTCACAGGGTTGGGATCGGCATACTATATGTTCTATGATGGATATGATGGTACTGACGATGCCAATACAAATTATGGA

HRV-C\_P0 2881 ATCTCATTAACAATGACATGGGAACCTTATGTTTCCGTGCTTTGGATGGAACTGGAGCAAGTATCAAAGTGTGGTGG  
HRV-C\_P1 2881 ATCTCATTAACAATGACATGGGAACCTTATGTTTCCGTGCTTTGGATGGAACTGGAGCAAGTATCAAAGTGTGGTGG  
HRV-C\_P6 2881 ATCTCATTAACAATGACATGGGAACCTTATGTTTCCGTGCTTTGGATGGAACTGGAGCAAGTATCAAAGTGTGGTGG

HRV-C\_P0 2961 CAAACCCAAGCACATAACTGCATGGATTCCCCGCCACCAGAGCAACCCAATACCTGCACAAATTTAGCACCAACTATA  
HRV-C\_P1 2961 CAAACCCAAGCACATAACTGCATGGATTCCCCGCCACCAGAGCAACCCAATACCTGCACAAATTTAGCACCAACTATA  
HRV-C\_P6 2961 CAAACCCAAGCACATAACTGCATGGATTCCCCGCCACCAGAGCAACCCAATACCTGCACAAATTTAGCACCAACTATA

HRV-C\_P0 3041 ACAAGCCAAAAGACAACCTGGCAGCACTGAGTTGGAACCAAAACACTTCTTTAAATACAGACAAGACATTACAAGTATTACC  
HRV-C\_P1 3041 ACAAGCCAAAAGACAACCTGGCAGCACTGAGTTGGAACCAAAACACTTCTTTAAATACAGACAAGACATTACAAGTATTACC  
HRV-C\_P6 3041 ACAAGCCAAAAGACAACCTGGCAGCACTGAGTTGGAACCAAAACACTTCTTTAAATACAGACAAGACATTACAAGTATTACC

HRV-C\_P0 3121 AACCTGGGACCCAGTGACATGTATGTTACACAAAAGAAGCCATCTATAAGTGTGCACACCTAACTGAACCTAATGAAAA  
HRV-C\_P1 3121 AACCTGGGACCCAGTGACATGTATGTTACACAAAAGAAGCCATCTATAAGTGTGCACACCTAACTGAACCTAATGAAAA  
HRV-C\_P6 3121 AACCTGGGACCCAGTGACATGTATGTTACACAAAAGAAGCCATCTATAAGTGTGCACACCTAACTGAACCTAATGAAAA

HRV-C\_P0 3201 CACCATACTCCTGGCTATATCATCAGATCTTCAAGTTGACAGCACAAGCATCCCTGGCCCTGACAATATACCTACCTGTG  
HRV-C\_P1 3201 CACCATACTCCTGGCTATATCATCAGATCTTCAAGTTGACAGCACAAGCATCCCTGGCCCTGACAATATACCTACCTGTG  
HRV-C\_P6 3201 CACCATACTCCTGGCTATATCATCAGATCTTCAAGTTGACAGCACAAGCATCCCTGGCCCTGACAATATACCTACCTGTG

HRV-C\_P0 3281 ATTGCACCACAGGTACCTATTATTGCAAAAAGCAAGGACAGATACTATCCAGTGAACCTAACACACCACAGTTGGTATGTA  
HRV-C\_P1 3281 ATTGCACCACAGGTACCTATTATTGCAAAAAGCAAGGACAGATACTATCCAGTGAACCTAACACACCACAGTTGGTATGTA  
HRV-C\_P6 3281 ATTGCACCACAGGTACCTATTATTGCAAAAAGCAAGGACAGATACTATCCAGTGAACCTAACACACCACAGTTGGTATGTA

HRV-C\_P0 3361 ATACAAGAATCCAGCTACTACCCAAAACACATTAGTATGATATACTGATTGGCGAAGGACCTTGCTCTCCAGGGGATTG  
HRV-C\_P1 3361 ATACAAGAATCCAGCTACTACCCAAAACACATTAGTATGATATACTGATTGGCGAAGGACCTTGCTCTCCAGGGGATTG  
HRV-C\_P6 3361 ATACAAGAATCCAGCTACTACCCAAAACACATTAGTATGATATACTGATTGGCGAAGGACCTTGCTCTCCAGGGGATTG

HRV-C\_P0 3441 TGGTGGTAAACTACTGTGTATACATGGAACCATAGGGATGGTGACAGCAGGTGGAGAGAATCATGTTGCATTATAGACT  
HRV-C\_P1 3441 TGGTGGTAAACTACTGTGTATACATGGAACCATAGGGATGGTGACAGCAGGTGGAGAGAATCATGTTGCATTATAGACT  
HRV-C\_P6 3441 TGGTGGTAAACTACTGTGTATACATGGAACCATAGGGATGGTGACAGCAGGTGGAGAGAATCATGTTGCATTATAGACT

HRV-C\_P0 3521 TGAGAAACTACAGCTCACTTAGTGAACATCAGGGTATCACAGACTATGTCACACAACCTGGGAAATGCATTTGGAGATGGG  
HRV-C\_P1 3521 TGAGAAACTACAGCTCACTTAGTGAACATCAGGGTATCACAGACTATGTCACACAACCTGGGAAATGCATTTGGAGATGGG  
HRV-C\_P6 3521 TGAGAAACTACAGCTCACTTAGTGAACATCAGGGTATCACAGACTATGTCACACAACCTGGGAAATGCATTTGGAGATGGG



HRV-C\_P0 3601 TTCACAAGTTCTATTAGGGAAACACTAGTATCTGCATGTGATGTGTCAGACAAACTCACTGGAAAAATCATCAAATGGAC  
HRV-C\_P1 3601 TTCACAAGTTCTATTAGGGAAACACTAGTATCTGCATGTGATGTGTCAGACAAACTCACTGGAAAAATCATCAAATGGAC  
HRV-C\_P6 3601 TTCACAAGTTCTATTAGGGAAACACTAGTATCTGCATGTGATGTGTCAGACAAACTCACTGGAAAAATCATCAAATGGAC

HRV-C\_P0 3681 GATTAGACTGATTAGTGCCTTATCAATTATAGTTAGAAACAGCACTGACACCCCCACTGTCATAGCCACACTTGCCCTGT  
HRV-C\_P1 3681 GATTAGACTGATTAGTGCCTTATCAATTATAGTTAGAAACAGCACTGACACCCCCACTGTCATAGCCACACTTGCCCTGT  
HRV-C\_P6 3681 GATTAGACTGATTAGTGCCTTATCAATTATAGTTAGAAACAGCACTGACACCCCCACTGTCATAGCCACACTTGCCCTGT

HRV-C\_P0 3761 TAGGATGCTCCGGTTCACCATGGCGCTACTTGAAAGACAAAGTTTGAAGTGCTGGGTATCGATCCACCACCTAGTAGA  
HRV-C\_P1 3761 TAGGATGCTCCGGTTCACCATGGCGCTACTTGAAAGACAAAGTTTGAAGTGCTGGGTATCGATCCACCACCTAGTAGA  
HRV-C\_P6 3761 TAGGATGCTCCGGTTCACCATGGCGCTACTTGAAAGACAAAGTTTGAAGTGCTGGGTATCGATCCACCACCTAGTAGA

HRV-C\_P0 3841 CAGAGTGACTCATGGCTAAAAAATTCACCGAGTTCTGTAATGCAGCCCGTGGGCTAGAATGGATCGGTGATAAATTATC  
HRV-C\_P1 3841 CAGAGTGACTCATGGCTAAAAAATTCACCGAGTTCTGTAATGCAGCCCGTGGGCTAGAATGGATCGGTGATAAATTATC  
HRV-C\_P6 3841 CAGAGTGACTCATGGCTAAAAAATTCACCGAGTTCTGTAATGCAGCCCGTGGGCTAGAATGGATCGGTGATAAATTATC

HRV-C\_P0 3921 TAAATTCATTGATTGGCTGAAAGGAAAAATACTACCCACTCTCCGACGCAAGTCAGATACACTTAAGGAGTGCAAAAAGA  
HRV-C\_P1 3921 TAAATTCATTGATTGGCTGAAAGGAAAAATACTACCCACTCTCCGACGCAAGTCAGATACACTTAAGGAGTGCAAAAAGA  
HRV-C\_P6 3921 TAAATTCATTGATTGGCTGAAAGGAAAAATACTACCCACTCTCCGACGCAAGTCAGATACACTTAAGGAGTGCAAAAAGA

HRV-C\_P0 4001 TTCCATTGTACAAAGAACAAGTCAAAGCATTTGCCACAGCATCAGAGGAAGCACAAGATGAATTAATGGTAAAGGTCAAC  
HRV-C\_P1 4001 TTCCATTGTACAAAGAACAAGTCAAAGCATTTGCCACAGCATCAGAGGAAGCACAAGATGAATTAATGGTAAAGGTCAAC  
HRV-C\_P6 4001 TTCCATTGTACAAAGAACAAGTCAAAGCATTTGCCACAGCATCAGAGGAAGCACAAGATGAATTAATGGTAAAGGTCAAC

HRV-C\_P0 4081 AAACCTGAAAAAGGGCTCCAGGATCTTGCCCATTTATACGCACTAGAAGCCAAACAAGTGCAGGAGATGTCTAGGGAAC  
HRV-C\_P1 4081 AAACCTGAAAAAGGGCTCCAGGATCTTGCCCATTTATACGCACTAGAAGCCAAACAAGTGCAGGAGATGTCTAGGGAAC  
HRV-C\_P6 4081 AAACCTGAAAAAGGGCTCCAGGATCTTGCCCATTTATACGCACTAGAAGCCAAACAAGTGCAGGAGATGTCTAGGGAAC

HRV-C\_P0 4161 ACAGCGCATGATGTGCTACAAGAAAACCCACAGAACAGAACCTGTCTGCATATTATTGCATGGACAACCAGGATGTGGTA  
HRV-C\_P1 4161 ACAGCGCATGATGTGCTACAAGAAAACCCACAGAACAGAACCTGTCTGCATATTATTGCATGGACAACCAGGATGTGGTA  
HRV-C\_P6 4161 ACAGCGCATGATGTGCTACAAGAAAACCCACAGAACAGAACCTGTCTGCATATTATTGCATGGACAACCAGGATGTGGTA

HRV-C\_P0 4241 AGTCCTTGGCCTCTAAAGTTATCGCTAGAGGCCTCACTAGTGAGAGCAATGTTTACTCTCTGCCACCTGATCCCAAGTAC  
HRV-C\_P1 4241 AGTCCTTGGCCTCTAAAGTTATCGCTAGAGGCCTCACTAGTGAGAGCAATGTTTACTCTCTGCCACCTGATCCCAAGTAC  
HRV-C\_P6 4241 AGTCCTTGGCCTCTAAAGTTATCGCTAGAGGCCTCACTAGTGAGAGCAATGTTTACTCTCTGCCACCTGATCCCAAGTAC

HRV-C\_P0 4321 TTTGATGGATACAACCAACAGGAAGTAGTGATCATGGATGATGTTGGCCAAAACCCAGATGGAAAAGATTTGAGTCTATT  
HRV-C\_P1 4321 TTTGATGGATACAACCAACAGGAAGTAGTGATCATGGATGATGTTGGCCAAAACCCAGATGGAAAAGATTTGAGTCTATT  
HRV-C\_P6 4321 TTTGATGGATACAACCAACAGGAAGTAGTGATCATGGATGATGTTGGCCAAAACCCAGATGGAAAAGATTTGAGTCTATT

HRV-C\_P0 4401 TTGCCAGATGGTGTCAAGCACCGAATTCATAACACCAATGGCCAATCTTGAAGATAAGGGTAGAGCATTTACTAGTGATT  
HRV-C\_P1 4401 TTGCCAGATGGTGTCAAGCACCGAATTCATAACACCAATGGCCAATCTTGAAGATAAGGGTAGAGCATTTACTAGTGATT  
HRV-C\_P6 4401 TTGCCAGATGGTGTCAAGCACCGAATTCATAACACCAATGGCCAATCTTGAAGATAAGGGTAGAGCATTTACTAGTGATT

HRV-C\_P0 4481 ATGTCATAGCCAGTACAAATATGTCTGTTCTCACACCACCTACTGTCTCATCACCTGAAGCCATAGATAGGAGATTCTTC  
HRV-C\_P1 4481 ATGTCATAGCCAGTACAAATATGTCTGTTCTCACACCACCTACTGTCTCATCACCTGAAGCCATAGATAGGAGATTCTTC  
HRV-C\_P6 4481 ATGTCATAGCCAGTACAAATATGTCTGTTCTCACACCACCTACTGTCTCATCACCTGAAGCCATAGATAGGAGATTCTTC

HRV-C\_P0 4561 TTGGATTGTGATGTTAAAATCATGCCAGCATATAACACAAAATAACCTTCTAAATGTTGCTAAAGCTTTGCTGCCATGCAC  
HRV-C\_P1 4561 TTGGATTGTGATGTTAAAATCATGCCAGCATATAACACAAAATAACCTTCTAAATGTTGCTAAAGCTTTGCTGCCATGCAC  
HRV-C\_P6 4561 TTGGATTGTGATGTTAAAATCATGCCAGCATATAACACAAAATAACCTTCTAAATGTTGCTAAAGCTTTGCTGCCATGCAC

HRV-C\_P0 4641 TGATTGCCAAAACAGAAATTTATAAACAATGTTGCCCTTTGACATGTGGCAAGGCTTTGATTCTGCAAAAACAAAAGGA  
HRV-C\_P1 4641 TGATTGCCAAAACAGAAATTTATAAACAATGTTGCCCTTTGACATGTGGCAAGGCTTTGATTCTGCAAAAACAAAAGGA  
HRV-C\_P6 4641 TGATTGCCAAAACAGAAATTTATAAACAATGTTGCCCTTTGACATGTGGCAAGGCTTTGATTCTGCAAAAACAAAAGGA

HRV-C\_P0 4721 CAAAGGCTAGTTACTCCATCAACACTGTGGTACAACAGCTACGGCAGGAGAAGAAAAACAGGAAATGTGTGGAACACAAT  
HRV-C\_P1 4721 CAAAGGCTAGTTACTCCATCAACACTGTGGTACAACAGCTACGGCAGGAGAAGAAAAACAGGAAATGTGTGGAACACAAT  
HRV-C\_P6 4721 CAAAGGCTAGTTACTCCATCAACACTGTGGTACAACAGCTACGGCAGGAGAAGAAAAACAGGAAATGTGTGGAACACAAT

Supplementary Information.html[7/2/2024, 10:33:08]

HRV-C\_P0 4801 CTCACTGCCATTTTCCAGGGATTGGGAGATGATTCAACACCAGGATTCATTATAGACCTCCTTAGTGCTTCTAAAGACCC  
HRV-C\_P1 4801 CTCACTGCCATTTTCCAGGGATTGGGAGATGATTCAACACCAGGATTCATTATAGACCTCCTTAGTGCTTCTAAAGACCC  
HRV-C\_P6 4801 CTCACTGCCATTTTCCAGGGATTGGGAGATGATTCAACACCAGGATTCATTATAGACCTCCTTAGTGCTTCTAAAGACCC

HRV-C\_P0 4881 AAAAGTCATAGATTTTTGTGAGAAAGAGGGATGGATCAAGCAATCTAGATGCTCAAAGATTGAGCGTGACTTCAACTATG  
HRV-C\_P1 4881 AAAAGTCATAGATTTTTGTGAGAAAGAGGGATGGATCAAGCAATCTAGATGCTCAAAGATTGAGCGTGACTTCAACTATG  
HRV-C\_P6 4881 AAAAGTCATAGATTTTTGTGAGAAAGAGGGATGGATCAAGCAATCTAGATGCTCAAAGATTGAGCGTGACTTCAACTATG

HRV-C\_P0 4961 CACAATACTGCATTAACCTGTGTGGGTAGCATCATCTTGATTTTAGGAAGCTGTTTATGCACTGTATAAGTTGATGTGTATA  
HRV-C\_P1 4961 CACAATACTGCATTAACCTGTGTGGGTAGCATCATCTTGATTTTAGGAAGCTGTTTATGCACTGTATAAGTTGATGTGTATA  
HRV-C\_P6 4961 CACAATACTGCATTAACCTGTGTGGGTAGCATCATCTTGATTTTAGGAAGCTGTTTATGCACTGTATAAGTTGATGTGTATA

HRV-C\_P0 5041 GCACAAGGCCCTACACTGGACTACCACAACCAAAAGTAAGAAAACCTGAACTAAGGAAAGCTGTCATTCAAGGTCCAGA  
HRV-C\_P1 5041 GCACAAGGCCCTACACTGGACTACCACAACCAAAAGTAAGAAAACCTGAACTAAGGAAAGCTGTCATTCAAGGTCCAGA  
HRV-C\_P6 5041 GCACAAGGCCCTACACTGGACTACCACAACCAAAAGTAAGAAAACCTGAACTAAGGAAAGCTGTCATTCAAGGTCCAGA

HRV-C\_P0 5121 ACATGAGTTTGAATGGCATTGATCAAAAGAACTGCCATATAGCCACAACAGATAGAGGAGACTTTAACCTGCTAGGAG  
HRV-C\_P1 5121 ACATGAGTTTGAATGGCATTGATCAAAAGAACTGCCATATAGCCACAACAGATAGAGGAGACTTTAACCTGCTAGGAG  
HRV-C\_P6 5121 ACATGAGTTTGAATGGCATTGATCAAAAGAACTGCCATATAGCCACAACAGATAGAGGAGACTTTAACCTGCTAGGAG

HRV-C\_P0 5201 TGTATGACAACTGTGCAGTGATACCCACACATGCCAACCCAGAGGACACAATTCTTATTGATGGTGTGAGACAAAAATT  
HRV-C\_P1 5201 TGTATGACAACTGTGCAGTGATACCCACACATGCCAACCCAGAGGACACAATTCTTATTGATGGTGTGAGACAAAAATT  
HRV-C\_P6 5201 TGTATGACAACTGTGCAGTGATACCCACACATGCCAACCCAGAGGACACAATTCTTATTGATGGTGTGAGACAAAAATT

HRV-C\_P0 5281 CTGAAACAGACAATTATCACAGATGAGAACGATGTGGATACAGAGGTGACAATACTGTGGTTAGACCCGAACGAAAAGTT  
HRV-C\_P1 5281 CTGAAACAGACAATTATCACAGATGAGAACGATGTGGATACAGAGGTGACAATACTGTGGTTAGACCCGAACGAAAAGTT  
HRV-C\_P6 5281 CTGAAACAGACAATTATCACAGATGAGAACGATGTGGATACAGAGGTGACAATACTGTGGTTAGACCCGAACGAAAAGTT

HRV-C\_P0 5361 TAGGGATATAAGAAGGTTCATACCAGATTATCAGAGAGATTGGCAGAATATGCGCCTTGTAACCAATGTGCCAAATTC  
HRV-C\_P1 5361 TAGGGATATAAGAAGGTTCATACCAGATTATCAGAGAGATTGGCAGAATATGCGCCTTGTAACCAATGTGCCAAATTC  
HRV-C\_P6 5361 TAGGGATATAAGAAGGTTCATACCAGATTATCAGAGAGATTGGCAGAATATGCGCCTTGTAACCAATGTGCCAAATTC

HRV-C\_P0 5441 CCATGCTAGATATAGAGATAGGTGATGTACATACCATATGGAGACATCAATCTGAGTGGAACCCACAACCCAGACTGCTT  
HRV-C\_P1 5441 CCATGCTAGATATAGAGATAGGTGATGTACATACCATATGGAGACATCAATCTGAGTGGAACCCACAACCCAGACTGCTT  
HRV-C\_P6 5441 CCATGCTAGATATAGAGATAGGTGATGTACATACCATATGGAGACATCAATCTGAGTGGAACCCACAACCCAGACTGCTT

HRV-C\_P0 5521 AAGTATGACTACCCACGAAACCAGGTGAGTGTGGTGGTGTATCTTAAATACAGGTAATATAATAGGTATACATGTGGG  
HRV-C\_P1 5521 AAGTATGACTACCCACGAAACCAGGTGAGTGTGGTGGTGTATCTTAAATACAGGTAATATAATAGGTATACATGTGGG  
HRV-C\_P6 5521 AAGTATGACTACCCACGAAACCAGGTGAGTGTGGTGGTGTATCTTAAATACAGGTAATATAATAGGTATACATGTGGG

HRV-C\_P0 5601 AGGGAATGGTAGAGTAGGATACTGTGCATCACTAACAAAGAGCTACTTTGCTTCTGCCAGGGTGAAATAGTCAACAAAT  
HRV-C\_P1 5601 AGGGAATGGTAGAGTAGGATACTGTGCATCACTAACAAAGAGCTACTTTGCTTCTGCCAGGGTGAAATAGTCAACAAAT  
HRV-C\_P6 5601 AGGGAATGGTAGAGTAGGATACTGTGCATCACTAACAAAGAGCTACTTTGCTTCTGCCAGGGTGAAATAGTCAACAAAT

HRV-C\_P0 5681 GCAAAGTACAGGATGTGGGTCTCAAGCCTATCAACACACCAGAACACTCCAAATTACACCCCAGTGTGTTCTATGACATA  
HRV-C\_P1 5681 GCAAAGTACAGGATGTGGGTCTCAAGCCTATCAACACACCAGAACACTCCAAATTACACCCCAGTGTGTTCTATGACATA  
HRV-C\_P6 5681 GCAAAGTACAGGATGTGGGTCTCAAGCCTATCAACACACCAGAACACTCCAAATTACACCCCAGTGTGTTCTATGACATA

HRV-C\_P0 5761 TTTCTGGAGAAAAAGAACC GGCTGTACTAACACAGAAAGATCCCAGATTGGAAACTGATTTGAAGACAGCCGTCATGTC  
HRV-C\_P1 5761 TTTCTGGAGAAAAAGAACC GGCTGTACTAACACAGAAAGATCCCAGATTGGAAACTGATTTGAAGACAGCCGTCATGTC  
HRV-C\_P6 5761 TTTCTGGAGAAAAAGAACC GGCTGTACTAACACAGAAAGATCCCAGATTGGAAACTGATTTGAAGACAGCCGTCATGTC

HRV-C\_P0 5841 CAAATACAAAGGGAATGTGAAAATTGAAATGAGTGAGAACATACAGATTGCAGTGGAACATTATTAGCTCAGCTGTTTA  
HRV-C\_P1 5841 CAAATACAAAGGGAATGTGAAAATTGAAATGAGTGAGAACATACAGATTGCAGTGGAACATTATTAGCTCAGCTGTTTA  
HRV-C\_P6 5841 CAAATACAAAGGGAATGTGAAAATTGAAATGAGTGAGAACATACAGATTGCAGTGGAACATTATTAGCTCAGCTGTTTA

HRV-C\_P0 5921 TGTTAGACATTAACCCAGAACCATATCTTTGGAACAGGCTGTGTATGGTATGGAAAACCTGGAACCACTCGATCTCACC  
HRV-C\_P1 5921 TGTTAGACATTAACCCAGAACCATATCTTTGGAACAGGCTGTGTATGGTATGGAAAACCTGGAACCACTCGATCTCACC  
HRV-C\_P6 5921 TGTTAGACATTAACCCAGAACCATATCTTTGGAACAGGCTGTGTATGGTATGGAAAACCTGGAACCACTCGATCTCACC

\_\_\_\_\_

HRV-C\_P0 6001 ACGAGTGCAGGCTTTCCCTATGTCACCATGGGGGTTAAAAAGAGAGACATTCTGAACAGAAAACAAGGGATGTTACAAA  
HRV-C\_P1 6001 ACGAGTGCAGGCTTTCCCTATGTCACCATGGGGGTTAAAAAGAGAGACATTCTGAACAGAAAACAAGGGATGTTACAAA  
HRV-C\_P6 6001 ACGAGTGCAGGCTTTCCCTATGTCACCATGGGGGTTAAAAAGAGAGACATTCTGAACAGAAAACAAGGGATGTTACAAA

HRV-C\_P0 6081 ACTTCAACATATGATTGACACCTATGGACTTGATCTACCATATGTGACCTACCTAAAAGATGAGCTTCGGGCTCCTGTTA  
HRV-C\_P1 6081 ACTTCAACATATGATTGACACCTATGGACTTGATCTACCATATGTGACCTACCTAAAAGATGAGCTTCGGGCTCCTGTTA  
HRV-C\_P6 6081 ACTTCAACATATGATTGACACCTATGGACTTGATCTACCATATGTGACCTACCTAAAAGATGAGCTTCGGGCTCCTGTTA

HRV-C\_P0 6161 AAATAAAACAGGGAAAACAAGAGCCATTGAAGCAGCTAGCATGAATGACACAGCAAACCTCAGAAGAGTGTGGCAAC  
HRV-C\_P1 6161 AAATAAAACAGGGAAAACAAGAGCCATTGAAGCAGCTAGCATGAATGACACAGCAAACCTCAGAAGAGTGTGGCAAC  
HRV-C\_P6 6161 AAATAAAACAGGGAAAACAAGAGCCATTGAAGCAGCTAGCATGAATGACACAGCAAACCTCAGAAGAGTGTGGCAAC

HRV-C\_P0 6241 TTGTACGCTGGCTTCCATGCAAACCCAGGTATTCTAACTGGGTCAGCTATAGGCTGTGATCCTGACATCTTCTGGTCACA  
HRV-C\_P1 6241 TTGTACGCTGGCTTCCATGCAAACCCAGGTATTCTAACTGGGTCAGCTATAGGCTGTGATCCTGACATCTTCTGGTCACA  
HRV-C\_P6 6241 TTGTACGCTGGCTTCCATGCAAACCCAGGTATTCTAACTGGGTCAGCTATAGGCTGTGATCCTGACATCTTCTGGTCACA

HRV-C\_P0 6321 ACTATATGCTTCAATGGAAAAACACCTGTTAGTGTTTGATTACACAAATTATGATGGAAGTCTACACCCAGTGTGGTTTC  
HRV-C\_P1 6321 ACTATATGCTTCAATGGAAAAACACCTGTTAGTGTTTGATTACACAAATTATGATGGAAGTCTACACCCAGTGTGGTTTC  
HRV-C\_P6 6321 ACTATATGCTTCAATGGAAAAACACCTGTTAGTGTTTGATTACACAAATTATGATGGAAGTCTACACCCAGTGTGGTTTC

HRV-C\_P0 6401 AAGCACTTGAACAACCTTTTAAACAACCTGGGTTTTCTGGTGAGTTAGCATATAAACTGTGTAACACAACCCACATATAC  
HRV-C\_P1 6401 AAGCACTTGAACAACCTTTTAAACAACCTGGGTTTTCTGGTGAGTTAGCATATAAACTGTGTAACACAACCCACATATAC  
HRV-C\_P6 6401 AAGCACTTGAACAACCTTTTAAACAACCTGGGTTTTCTGGTGAGTTAGCATATAAACTGTGTAACACAACCCACATATAC

HRV-C\_P0 6481 AAGGATGAAATATACACAGTGAAGGGAGGAATGCCTTCGGGAATCTCAGGAACCTCCATTTTCAACACAATTATAAAACA  
HRV-C\_P1 6481 AAGGATGAAATATACACAGTGAAGGGAGGAATGCCTTCGGGAATCTCAGGAACCTCCATTTTCAACACAATTATAAAACA  
HRV-C\_P6 6481 AAGGATGAAATATACACAGTGAAGGGAGGAATGCCTTCGGGAATCTCAGGAACCTCCATTTTCAACACAATTATAAAACA

HRV-C\_P0 6561 CATAATAATTAGGACTTTGGTTTTAGACACATACAAAGGGATTGAATTGGACAAATTAATAAATTGTGGCATATGGTGATG  
HRV-C\_P1 6561 CATAATAATTAGGACTTTGGTTTTAGACACATACAAAGGGATTGAATTGGACAAATTAATAAATTGTGGCATATGGTGATG  
HRV-C\_P6 6561 CATAATAATTAGGACTTTGGTTTTAGACACATACAAAGGGATTGAATTGGACAAATTAATAAATTGTGGCATATGGTGATG

HRV-C\_P0 6641 ATGTGATAGCTTCTACCCAGAAGAGCTTGACCCAGCACAGATTGCTGTGTCTGGTCTCAAGTACGGGCTAACAATAACA  
HRV-C\_P1 6641 ATGTGATAGCTTCTACCCAGAAGAGCTTGACCCAGCACAGATTGCTGTGTCTGGTCTCAAGTACGGGCTAACAATAACA  
HRV-C\_P6 6641 ATGTGATAGCTTCTACCCAGAAGAGCTTGACCCAGCACAGATTGCTGTGTCTGGTCTCAAGTACGGGCTAACAATAACA

HRV-C\_P0 6721 CCTGCTGACAAGTCTGACCAGTTTGTGAAAGTCAACTGGGACAATGCCACATTTTGAAGAGAGGATTCCGTGTGGATGA  
HRV-C\_P1 6721 CCTGCTGACAAGTCTGACCAGTTTGTGAAAGTCAACTGGGACAATGCCACATTTTGAAGAGAGGATTCCGTGTGGATGA  
HRV-C\_P6 6721 CCTGCTGACAAGTCTGACCAGTTTGTGAAAGTCAACTGGGACAATGCCACATTTTGAAGAGAGGATTCCGTGTGGATGA

HRV-C\_P0 6801 GAGATACAGTTTCTTGTACACCCGTTTTCCAGAAAAGGAGATCTTTGAATCGATTAGATGGACCAGAGACCCAAAGA  
HRV-C\_P1 6801 GAGATACAGTTTCTTGTACACCCGTTTTCCAGAAAAGGAGATCTTTGAATCGATTAGATGGACCAGAGACCCAAAGA  
HRV-C\_P6 6801 GAGATACAGTTTCTTGTACACCCGTTTTCCAGAAAAGGAGATCTTTGAATCGATTAGATGGACCAGAGACCCAAAGA

HRV-C\_P0 6881 ACACTCAAGACCATGTATACTCTTTATGTCTTTAATGTGGCACAATGGTGAAGAGCCTTACAAGGAGTTCATATCCAAA  
HRV-C\_P1 6881 ACACTCAAGACCATGTATACTCTTTATGTCTTTAATGTGGCACAATGGTGAAGAGCCTTACAAGGAGTTCATATCCAAA  
HRV-C\_P6 6881 ACACTCAAGACCATGTATACTCTTTATGTCTTTAATGTGGCACAATGGTGAAGAGCCTTACAAGGAGTTCATATCCAAA

HRV-C\_P0 6961 ATTAGAAAGACAGAAGTAGGCCGTAGGTTGTATCTTCCACCATAACAACCTGCTAGAGCGTACTTGGATTGATAAATTCAT  
HRV-C\_P1 6961 ATTAGAAAGACAGAAGTAGGCCGTAGGTTGTATCTTCCACCATAACAACCTGCTAGAGCGTACTTGGATTGATAAATTCAT  
HRV-C\_P6 6961 ATTAGAAAGACAGAAGTAGGCCGTAGGTTGTATCTTCCACCATAACAACCTGCTAGAGCGTACTTGGATTGATAAATTCAT

HRV-C\_P0 7041 CTGAATAGCAATAGTAATGTAGAAATCTACCTGNNNNNNNNNNNNNNNNNNNNNNNNNNNNNNNNNNNNNNNNNNNNNN  
HRV-C\_P1 7041 CTGAATAGCAATAGTAATGTAGAAATCTACCTGAGTAGGAGTAGGGTTTTATAAAAAAAAAAAAAAAAAAAAAAAAAAAAA  
HRV-C\_P6 7041 CTGAATAGCAATAGTAATGTAGAAATCTACCTGAGTAGGAGTAGGGTTTTATAAAAAAAAAAAAAAAAAAAAAAAAAAAAA

HRV-C\_P0 7121 NNNNNNNNNNNNNNNN  
HRV-C\_P1 7121 AAAAAAAAAAAAAAAAAA  
HRV-C\_P6 7121 AAAAAAAAAAAAAAAAAA
